# Supplementary material
Source: publisher figshare collection journal article supplement (https://frontiersin.figshare.com/ndownloader/files/12954956)
Supplement: Supplementary file [file 12954956]

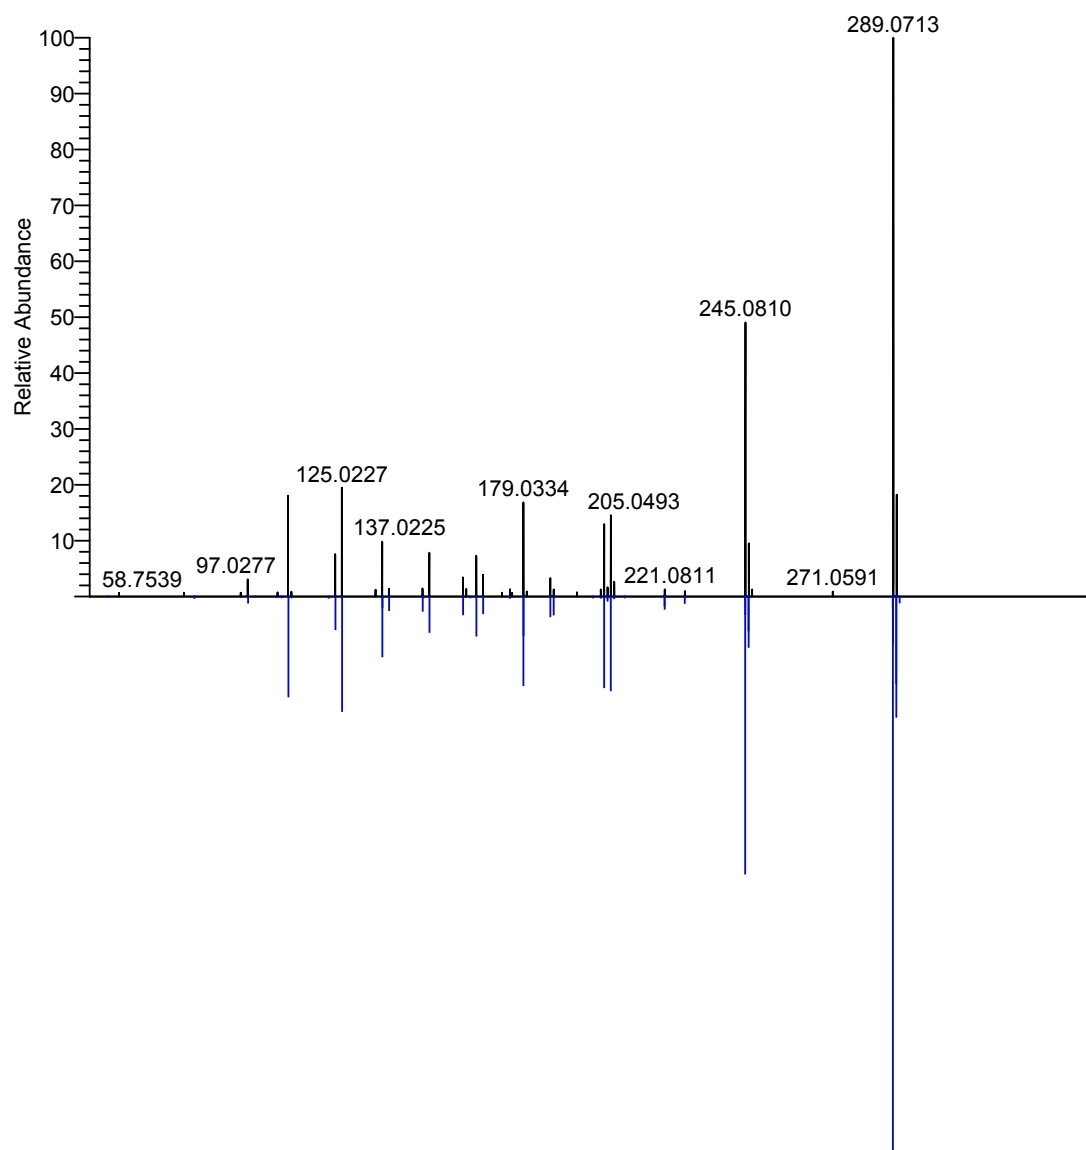

**Figure S1.** Mirrored HCD fragmentation spectra of endogenous catechin from Year 1 paper birch (above) and a catechin standard (below) from negative ionization mode. Catechin was identified and shown to be distinct from its isomer, epicatechin, as commercial standards of each of these compounds were chromatographically resolved. HCD fragmentation was performed at a normalized collision energy of 25.
